# Supplementary figures and images for: Lactobacillus plantarum ZJ316 alleviates ulcerative colitis by inhibiting inflammation and regulating short-chain fatty acid levels and the gut microbiota in a mouse model
Source: Royal Society of Chemistry journal article supplement (doi:10.1039/d2fo02567a), 2023-01-01

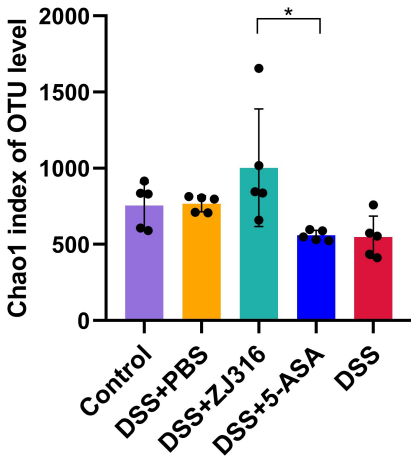

Supplement: d2fo02567a1.pdf [file d2fo02567a1.pdf]
